# Supplementary material for: First Comparative Analysis of Clostridium septicum Genomes Provides Insights Into the Taxonomy, Species Genetic Diversity, and Virulence Related to Gas Gangrene
Source: Front Microbiol. 2021 Dec 9;12:771945. doi: 10.3389/fmicb.2021.771945 (PMC8696124; doi:10.3389/fmicb.2021.771945)
Supplement: Supplementary Table S1 — Metadata summary of sequences retrieved from NCBI. Details with respect to species, strain name, and NCBI accession numbers of species of Clostridium sensu stricto used for 16S rRNA phylogenetic analysis are shown. [file Table_1.XLSX]

## Sheet: Sheet1
First comparative analysis of Clostridium septicum genomes provides insights into the taxonomy, species genetic diversity and virulence related to gas gangrene
Prasad Thomas1,2#, Mostafa Y. Abdel-Glil1,3,4#*, Anbazhagan Subbaiyan2, Anne Busch1, Inga Eichhorn5, Lothar H. Wieler5,6, Heinrich Neubauer1, Mathias Pletz3, and Christian Seyboldt1
1Institute of Bacterial Infections and Zoonoses, Friedrich-Loeffler-Institut, Naumburger Str. 96A, 07743 Jena, Germany.
2Division of Bacteriology and Mycology, ICAR-Indian Veterinary Research Institute, Izatnagar, 243122, India.
3Institute for Infectious Diseases and Infection Control, Jena University Hospital – Friedrich Schiller University, Jena, Germany.
4Department of Pathology, Faculty of Veterinary Medicine, Zagazig University, Sharkia province, Egypt.
5Institute of Microbiology and Epizootics, Department of Veterinary Medicine, Freie Universität Berlin, Berlin, Germany.
6Robert Koch Institute, Berlin, Germany.
Correspondence
Mostafa Y. Abdel-Glil
mostafa.abdel-glil@fli.de
Table S1: Metadata summary of sequences retrieved from NCBI
Table S3: Taxonomic classification of C. septicum based on In silico DNA-DNA hybridization (isDDH)
Table S3: Prophages identified in Clostridium septicum strains
Table S4: KEGG pathway modules identified in the core genome of Clostridium septicum strains
Table S5: Predicted B-cell epitopes in CctA and in C. septicum cytolysin by ABCpred server

## Sheet: Table_S1
Table S1: Metadata summary of sequences retrieved from NCBI
	Whole genome sequences used for 16S rRNA predicitons
n.	Species	Name	NCBI Accession
1	Clostridium acetobutylicum	DSM 1731	NC_015687.1
2	Clostridium acetobutylicum	EA 2018	NC_017295.1
3	Clostridium akagii	DSM 12554	GCF_000686725.1
4	Clostridium algidicarnis	B3	NZ_JNLN01000001.1
5	Clostridium arbusti	SL206	GCF_000246895.1
6	Clostridium argentinense	CDC 2741 U732	GCF_000816675.1
7	Clostridium aurantibutyricum	DSM 793	GCF_002006235.1
8	Clostridium autoethanogenum	DSM 10061	NZ_CP012395.1
9	Clostridium baratii strain	CDC51267	NZ_CP014204.2
10	Clostridium beijerinckii	ATCC 35702	NZ_CP006777.1
11	Clostridium beijerinckii	NCIMB	NZ_CP010086.2
12	Clostridium botulinum A	ATCC19397	NC_009697.1
13	Clostridium botulinum B1	Okra	NC_010516.1
14	Clostridium botulinum C	Eklund	GCF_000171095.1
15	Clostridium botulinum D	CCUG797	GCF_000768655.1
16	Clostridium butyricum	60E.3	GCF_000371625.1
17	Clostridium chauvoei	DSM 7528	NZ_CP018624
18	Clostridium chauvoei	JF4335	NZ_LT799839.1
19	Clostridium colicanis	DSM 13634	GCF_001593985.1
20	Clostridium coskatii	PS02	GCF_001636835.1
21	Clostridium disporicum	2789STDY5834856	GCF_001405015.1
22	Clostridium drakei	SL1	NZ_CP020953.1
23	Clostridium estertheticum	DSM8809	NZ_CP015756.1
24	Clostridium fallax strain	DSM 2631	GCF_900129365.1
25	Clostridium felsineum	DSM 794	GCF_002006355.1
26	Clostridium haemolyticum	NCTC 9693	GCF_000724225.2
27	Clostridium intestinale	DSM 6191	GCF_900130055.1
28	Clostridium kluyveri	DSM 555	NC_009706.1
29	Clostridium ljungdahlii	DSM 13528	NC_014328.1
30	Clostridium magnum	DSM 2767	GCF_900129955.1
31	Clostridium novyi	NT	NC_008593.1
32	Clostridium pasteurianum	M150B	NZ_CP013019.1
33	Clostridium perfringens	ATCC 13124	NC_008261.1
34	Clostridium ragsdalei	P11 CLRAG	GCF_001675165.1
35	Clostridium roseum	DSM 7320	GCF_002006215.1
36	Clostridium saccharobutylicum	DSM 13864	GCF_001657435.1
37	Clostridium sartagoforme	AAU1	GCF_000401215.1
38	Clostridium saudiense	JCC	GCF_000577815.1
39	Clostridium scatologenes	ATCC 25775	NZ_CP009933.1
40	Clostridium senegalense	JC122 JC122T	GCF_000285575.1
41	Clostridium sporogenes	DSM 795	NZ_CP011663.1
42	Clostridium tetani	ATCC 9441	GCF_000762315.2
43	Clostridium tyrobutyricum	FAM22552	GCF_000816585.1
44	Clostridium ventriculi	NCTC12966	GCF_900456775.1

## Sheet: Table S2
Table S2: Taxonomic classification of C. septicum based on in silico DNA-DNA hybridization (isDDH). The DDH values and the respective confidence intervals (C.I.), distance and probability that DDH > 70% (i.e., same species) estimates based on for formula 2 (identities / HSP length).
		Formula 2				G+C difference
Query genomes	Reference genome	DDH	Model C.I.	Distance	Prob. DDH >= 70%
Clostridium septicum
DRS014147	DSM 7534	96.9	[95.7 - 97.7%]	0.0045	97.62	0.35
P1044	DSM 7534	97.9	[97 - 98.5%]	0.0032	97.84	0.34
VAT12	DSM 7534	97.7	[96.7 - 98.4%]	0.0035	97.79	0.09
RVDL_ALI_Clost_septicum_01	DSM 7534	96.7	[95.4 - 97.6%]	0.0047	97.58	0.38
Clostridium chauvoei
DSM_7528	DSM 7534	28.8	[26.4 - 31.3%]	0.149	0.06	0.43
JF4335	DSM 7534	28.8	[26.4 - 31.3%]	0.1489	0.06	0.44

## Sheet: Table S3
Table S3: Prophages identified in Clostridium septicum strains
Prohage 1
attL N/A
PHAGE_Strept_PH15_NC_010945: putative integrase; PP_01178; phage(gi190151416) 4.89e-27
PHAGE_Clostr_phiCT453A_NC_028991: hypothetical protein; PP_01179; phage(gi100004) 1.23e-49
PHAGE_Clostr_phiCT9441A_NC_029022: Cro/CI family transcriptional regulator; PP_01180; phage(gi971821647) 2.73e-28
hypothetical; PP_01181 N/A
hypothetical; PP_01182 N/A
hypothetical; PP_01183 N/A
hypothetical; PP_01184 N/A
PHAGE_Clostr_phiCT453A_NC_028991: hypothetical protein; PP_01185; phage(gi100011) 1.43e-21
hypothetical; PP_01186 N/A
PHAGE_Aeriba_AP45_NC_048651: hypothetical protein; PP_01187; phage(gi100013) 1.05e-112
PHAGE_Thermo_THSA_485A_NC_018264: hypothetical protein; PP_01188; phage(gi397912643) 4.86e-09
hypothetical; PP_01189 N/A
PHAGE_Cellul_phi46:3_NC_021792: RecT family protein; PP_01190; phage(gi526177218) 5.48e-75
PHAGE_Bacill_Pascal_NC_027372: endolysin; PP_01191; phage(gi100033) 5.14e-62
PHAGE_Faecal_FP_Epona_NC_047910: hypothetical protein; PP_01192; phage(gi100027) 3.74e-44
PHAGE_Clostr_phi3626_NC_003524: putative single stranded DNA binding protein; PP_01193; phage(gi20066002) 2.38e-53
PHAGE_Clostr_phiCP13O_NC_019506: hypothetical protein; PP_01194; phage(gi422935104) 1.98e-54
hypothetical; PP_01195 N/A
PHAGE_Haloru_CGphi46_NC_021537: hypothetical protein; PP_01196; phage(gi514051278) 5.60e-11
hypothetical; PP_01197 N/A
hypothetical; PP_01198 N/A
PHAGE_Anoxyb_A403_NC_048701: holin; PP_01199; phage(gi100034) 7.84e-14
hypothetical; PP_01200 N/A
hypothetical; PP_01201 N/A
PHAGE_Clostr_phiCT19406A_NC_030950: hypothetical protein; PP_01202; phage(gi100025) 3.87e-17
hypothetical; PP_01203 N/A
PHAGE_Bacill_BalMu_1_NC_030945: hypothetical protein; PP_01204; phage(gi100025) 4.03e-36
PHAGE_Bacill_phi4J1_NC_029008: portal protein; PP_01205; phage(gi971821616) 1.00e-29
PHAGE_Lactob_ATCC8014_NC_019916: capsid; PP_01206; phage(gi431809800) 9.97e-11
hypothetical; PP_01207 N/A
PHAGE_Faecal_FP_oengus_NC_047916: hypothetical protein; PP_01208; phage(gi100031) 5.59e-15
PHAGE_Entero_vB_IME197_NC_028671: hypothetical protein; PP_01209; phage(gi966199011) 9.68e-39
PHAGE_Staphy_StauST398_3_NC_021332: hypothetical protein; PP_01210; phage(gi509140984) 1.68e-12
PHAGE_Oenoco_phiS11_NC_023571: prophage protein; PP_01211; phage(gi589286634) 3.80e-08
PHAGE_Brevib_Abouo_NC_029029: major capsid protein; PP_01212; phage(gi971767174) 2.73e-80
hypothetical; PP_01213 N/A
PHAGE_Clostr_phiCD146_NC_028958: hypothetical protein; PP_01214; phage(gi971820164) 3.19e-23
PROPHAGE_Shewan_MR-1: ISSod4, transposase; PP_01215; phage(gi24373869) 2.46e-17
PROPHAGE_Escher_CFT073: transposase; PP_01216; phage(gi26246249) 4.66e-36
hypothetical; PP_01217 N/A
PHAGE_Clostr_phiCD146_NC_028958: hypothetical protein; PP_01218; phage(gi971820165) 3.66e-13
PHAGE_Clostr_phiCD146_NC_028958: hypothetical protein; PP_01219; phage(gi971820166) 1.40e-24
PHAGE_Clostr_phiCD146_NC_028958: hypothetical protein; PP_01220; phage(gi971820166) 4.26e-07
PHAGE_Clostr_phiCD146_NC_028958: hypothetical protein; PP_01221; phage(gi971820167) 4.07e-24
PHAGE_Clostr_phiCD146_NC_028958: hypothetical protein; PP_01222; phage(gi971820168) 2.80e-15
PHAGE_Clostr_phiCD146_NC_028958: hypothetical protein; PP_01223; phage(gi971820169) 3.55e-79
PHAGE_Brevib_Jimmer2_NC_041976: hypothetical protein; PP_01224; phage(gi100023) 4.13e-09
hypothetical; PP_01225 N/A
PHAGE_Staphy_Pvl108_NC_008689: tail length tape measure protein1; PP_01226; phage(gi119443701) 1.51e-68
PHAGE_Clostr_phiCT19406C_NC_029006: tail-tape measure protein; PP_01227; phage(gi971821557) 4.95e-14
PHAGE_Clostr_phiCDHM19_NC_028996: putative tail tape measure protein (partial); PP_01228; phage(gi971763885) 3.73e-28
PHAGE_Clostr_phiCDHM19_NC_028996: putative tail tape measure protein (partial); PP_01229; phage(gi971763885) 7.05e-14
hypothetical; PP_01230 N/A
PHAGE_Lactob_LLKu_NC_022989: putative tape measure protein; PP_01231; phage(gi564014243) 5.12e-33
PHAGE_Clostr_phi8074_B1_NC_019924: putative phage tail protein; PP_01232; phage(gi431810373) 6.70e-06
PHAGE_Clostr_phi8074_B1_NC_019924: putative phage tail protein; PP_01233; phage(gi431810378) 4.69e-25
hypothetical; PP_01234 N/A
PHAGE_Strept_5093_NC_012753: hypothetical protein; PP_01235; phage(gi238801910) 3.55e-05
attR N/A
Prophage 2
PHAGE_Butyri_Arawn_NC_048848: hypothetical protein; PP_01550; phage(gi100027) 2.09e-16
hypothetical; PP_01551 N/A
hypothetical; PP_01552 N/A
hypothetical; PP_01553 N/A
hypothetical; PP_01554 N/A
PHAGE_Clostr_vB_CpeS_CP51_NC_021325: hypothetical protein; PP_01555; phage(gi509140074) 1.14e-11
hypothetical; PP_01556 N/A
hypothetical; PP_01557 N/A
PHAGE_Clostr_PhiS63_NC_017978: gp31; PP_01558; phage(gi388570658) 5.14e-54
PHAGE_Bacill_250_NC_029024: hypothetical protein; PP_01559; phage(gi971766630) 1.27e-07
hypothetical; PP_01560 N/A
hypothetical; PP_01561 N/A
PHAGE_Bacill_phBC6A51_NC_004820: hypothetical protein; PP_01562; phage(gi31415768) 4.56e-21
PHAGE_Bacill_phBC6A51_NC_004820: hypothetical protein; PP_01563; phage(gi31415769) 1.63e-56
hypothetical; PP_01564 N/A
PHAGE_Clostr_vB_CpeS_CP51_NC_021325: hypothetical protein; PP_01565; phage(gi509140084) 2.33e-25
attL N/A
PHAGE_Clostr_phiCD38_2_NC_015568: integrase; PP_01566; phage(gi333798160) 1.18e-40
PHAGE_Clostr_vB_CpeS_CP51_NC_021325: putative resolvase; PP_01567; phage(gi509140089) 1.41e-24
PHAGE_Clostr_vB_CpeS_CP51_NC_021325: hypothetical protein; PP_01568; phage(gi509140040) 1.36e-75
PHAGE_Clostr_phiCP39_O_NC_011318: large terminase; PP_01569; phage(gi208429857) 4.38e-107
PHAGE_Entero_phiFL3A_NC_013648: portal protein; PP_01570; phage(gi281416257) 1.23e-89
PHAGE_Clostr_phiCT9441A_NC_029022: head morphogenesis protein; PP_01571; phage(gi971821680) 1.53e-127
hypothetical; PP_01572 N/A
PHAGE_Entero_vB_IME197_NC_028671: hypothetical protein; PP_01573; phage(gi966199011) 2.13e-38
PHAGE_Brocho_BL3_NC_015254: gp8; PP_01574; phage(gi327409398) 9.23e-29
PHAGE_Clostr_CDMH1_NC_024144: putative major capsid protein; PP_01575; phage(gi640884865) 1.16e-85
PHAGE_Brocho_BL3_NC_015254: gp10; PP_01576; phage(gi327409400) 5.06e-24
PHAGE_Lactoc_PLgT_1_NC_031016: hypothetical protein; PP_01577; phage(gi100020) 4.82e-07
PHAGE_Strept_phiARI0468_1_NC_031929: hypothetical protein; PP_01578; phage(gi100011) 1.02e-21
hypothetical; PP_01579 N/A
PHAGE_Strept_phiARI0746_NC_031907: hypothetical protein; PP_01580; phage(gi100005) 2.15e-08
PHAGE_Strept_phiARI0004_NC_031920: hypothetical protein; PP_01581; phage(gi100010) 9.80e-58
PHAGE_Strept_phiARI0031_NC_031910: hypothetical protein; PP_01582; phage(gi100010) 2.11e-11
PHAGE_Strept_phiARI0031_NC_031910: hypothetical protein; PP_01583; phage(gi100009) 1.50e-12
PHAGE_Strept_phiARI0131_1_NC_031901: hypothetical protein; PP_01584; phage(gi100012) 3.56e-28
PHAGE_Strept_IC1_NC_024370: Phage protein; PP_01585; phage(gi658307766) 6.44e-45
hypothetical; PP_01586 N/A
PHAGE_Clostr_vB_CpeS_CP51_NC_021325: hypothetical protein; PP_01587; phage(gi509140060) 1.45e-21
PHAGE_Clostr_vB_CpeS_CP51_NC_021325: hypothetical protein; PP_01588; phage(gi509140061) 4.99e-69
PHAGE_Clostr_vB_CpeS_CP51_NC_021325: putative holin; PP_01589; phage(gi509140062) 1.20e-61
PHAGE_Clostr_phi3626_NC_003524: endolysin; PP_01590; phage(gi20065983) 2.47e-52
PHAGE_Bacill_G_NC_023719: gp417; PP_01591; phage(gi593777872) 5.66e-11
attR N/A
Prophage 3
PHAGE_Geobac_E2_NC_009552: putative tail tape measure protein; PP_03161; phage(gi148747742) 1.41e-83
attL N/A
hypothetical; PP_03162 N/A
hypothetical; PP_03163 N/A
hypothetical; PP_03164 N/A
PHAGE_Strept_phiARI0131_2_NC_031941: hypothetical protein; PP_03165; phage(gi100011) 4.17e-16
PHAGE_Clostr_phiCD6356_NC_015262: hypothetical protein; PP_03166; phage(gi326536853) 9.55e-15
PHAGE_Clostr_phiCD6356_NC_015262: putative major capsid protein A; PP_03167; phage(gi326536852) 2.58e-98
PHAGE_Paenib_HB10c2_NC_028758: ATP-dependent Clp protease proteolytic subunit; PP_03168; phage(gi971740652) 8.35e-54
PHAGE_Clostr_phiCD6356_NC_015262: putative phage portal protein; PP_03169; phage(gi326536850) 1.57e-88
hypothetical; PP_03170 N/A
PHAGE_Clostr_phiCD6356_NC_015262: putative terminase large subunit; PP_03171; phage(gi326536849) 2.36e-140
PHAGE_Clostr_phiCD6356_NC_015262: putative terminase small subunit; PP_03172; phage(gi326536848) 1.01e-50
PHAGE_Clostr_phiCD6356_NC_015262: putative HNH endonuclease; PP_03173; phage(gi326536906) 1.42e-16
PHAGE_Clostr_phiCD6356_NC_015262: putative site-specific recombinase; PP_03174; phage(gi326536904) 1.66e-68
PHAGE_Clostr_phiCT453A_NC_028991: hypothetical protein; PP_03175; phage(gi100023) 3.00e-31
PHAGE_Clostr_phiCT19406A_NC_030950: hypothetical protein; PP_03176; phage(gi100010) 4.99e-19
PHAGE_Flavob_vB_FspS_laban6_1_NC_048834: recombination protein; PP_03177; phage(gi100049) 5.66e-34
hypothetical; PP_03178 N/A
hypothetical; PP_03179 N/A
hypothetical; PP_03180 N/A
hypothetical; PP_03181 N/A
hypothetical; PP_03182 N/A
hypothetical; PP_03183 N/A
PHAGE_Clostr_phiMMP03_NC_028959: hypothetical protein; PP_03184; phage(gi971820295) 6.10e-88
PHAGE_Staphy_phiRS7_NC_022914: DnaD and phage-associated domain protein; PP_03185; phage(gi560185998) 1.28e-26
hypothetical; PP_03186 N/A
hypothetical; PP_03187 N/A
hypothetical; PP_03188 N/A
PHAGE_Clostr_phiSM101_NC_008265: Helix-turn-helix domain protein; PP_03189; phage(gi110804036) 2.46e-25 VA
PHAGE_Clostr_phiSM101_NC_008265: Helix-turn-helix domain protein; PP_03190; phage(gi110804036) 4.17e-19 MN
attR N/A
Prophage 4
attL N/A
PHAGE_Anoxyb_A403_NC_048701: tail length tape-measure protein; PP_00999; phage(gi100057) 5.41e-34
PHAGE_Anoxyb_A403_NC_048701: tail length tape-measure protein; PP_01000; phage(gi100057) 6.13e-29
hypothetical; PP_01001 N/A
hypothetical; PP_01002 N/A
PHAGE_Geobac_E2_NC_009552: putative N-acetylmuramoyl-L-alanine amidase; PP_01003; phage(gi148747751) 1.54e-19
PHAGE_Bacill_IEBH_NC_011167: holin; PP_01004; phage(gi197261577) 5.99e-30
PHAGE_Bacill_1_NC_009737: hypothetical protein; PP_01005; phage(gi155042949) 3.33e-14
PHAGE_Clostr_phiCT19406C_NC_029006: endopeptidase/tail protein; PP_01006; phage(gi971821559) 8.06e-55
PHAGE_Clostr_phiCT19406C_NC_029006: tail protein; PP_01007; phage(gi971821558) 1.28e-48
PHAGE_Staphy_P954_NC_013195: tail length tape measure protein; PP_01008; phage(gi257136415) 3.75e-122
hypothetical; PP_01009 N/A
PHAGE_Paenib_Harrison_NC_028746: hypothetical protein; PP_01010; phage(gi971482322) 6.20e-08
PHAGE_Clostr_phi3626_NC_003524: major tail protein; PP_01011; phage(gi20065974) 5.09e-39
PHAGE_Bacill_phIS3501_NC_019502: phage protein; PP_01012; phage(gi422934335) 1.88e-10
PHAGE_Bacill_phIS3501_NC_019502: gp10 family phage protein; PP_01013; phage(gi422934334) 1.02e-19
PHAGE_Bacill_phIS3501_NC_019502: phage DNA packaging protein; PP_01014; phage(gi422934332) 3.56e-07
PHAGE_Azospi_Cd_NC_010355: Phage major capsid protein; PP_01015; phage(gi168495136) 1.85e-46
PHAGE_Geobac_E2_NC_009552: putative Clp peptidase; PP_01016; phage(gi148747731) 4.22e-44
PHAGE_Yersin_PY54_NC_005069: portal protein; PP_01017; phage(gi33770511) 1.97e-87
PHAGE_Bacill_G_NC_023719: gp253; PP_01018; phage(gi593777709) 9.92e-06
hypothetical; PP_01019 N/A
hypothetical; PP_01020 N/A
PHAGE_Nocard_NBR1_NC_016569: terminase large subunit; PP_01021; phage(gi372217589) 5.50e-89
PHAGE_Bacill_phIS3501_NC_019502: terminase small subunit; PP_01022; phage(gi422934327) 1.83e-22
PHAGE_Bacill_G_NC_023719: gp514; PP_01023; phage(gi593777969) 4.57e-21
PHAGE_Faecal_FP_Taranis_NC_047914: hypothetical protein; PP_01024; phage(gi100081) 5.29e-23
PHAGE_Bacill_vB_BtS_B83_NC_048762: head morphogenesis protein; PP_01025; phage(gi100068) 1.13e-131
hypothetical; PP_01026 N/A
hypothetical; PP_01027 N/A
PHAGE_Bacill_phi105_NC_048631: hypothetical protein; PP_01028; phage(gi100051) 1.58e-31
PHAGE_Clostr_phiC2_NC_009231: putative abortive infection bacteriophage resistance protein ORF 37; PP_01029; phage(gi134287370) 2.70e-55
PHAGE_Faecal_FP_Lugh_NC_047912: hypothetical protein; PP_01030; phage(gi100017) 6.51e-05
PHAGE_Lactob_3_521_NC_048753: tail fiber protein; PP_01031; phage(gi100052) 1.11e-15
PHAGE_Entero_phiFL4A_NC_013644: DNA helicase; PP_01032; phage(gi281416462) 1.07e-177
PHAGE_Coryne_Lederberg_NC_048790: DNA helicase; PP_01033; phage(gi100044) 6.01e-26
PHAGE_Coryne_StAB_NC_048780: exonuclease; PP_01034; phage(gi100048) 0.0
PHAGE_Clostr_phiCT453A_NC_028991: hypothetical protein; PP_01035; phage(gi100018) 0.0
PHAGE_Clostr_phiCT453A_NC_028991: hypothetical protein; PP_01036; phage(gi100017) 5.16e-78
PHAGE_Clostr_phiCT453A_NC_028991: hypothetical protein; PP_01037; phage(gi100016) 1.44e-125
hypothetical; PP_01038 N/A
hypothetical; PP_01039 N/A
hypothetical; PP_01040 N/A
hypothetical; PP_01041 N/A
PHAGE_Bacill_BM5_NC_029069: hypothetical protein; PP_01042; phage(gi985757808) 3.88e-05
PHAGE_Bacill_Pascal_NC_027372: hypothetical protein; PP_01043; phage(gi100027) 3.28e-09
attR N/A

## Sheet: Table S4
Table S4: KEGG pathway modules identified in the core genome of Clostridium septicum strains
Pathway modules
1. Carbohydrate metabolism
Central carbohydrate metabolism
M00001 Glycolysis (Embden-Meyerhof pathway), glucose => pyruvate (12) (complete 9/9)
M00002 Glycolysis, core module involving three-carbon compounds (7) (complete 5/5)
M00307 Pyruvate oxidation, pyruvate => acetyl-CoA (2) (complete 1/1)
M00007 Pentose phosphate pathway, non-oxidative phase, fructose 6P => ribose 5P (4) (complete 4/4)
M00005 PRPP biosynthesis, ribose 5P => PRPP (1) (complete 1/1)
Other carbohydrate metabolism
M00632 Galactose degradation, Leloir pathway, galactose => alpha-D-glucose-1P (4) (complete 4/4)
M00854 Glycogen biosynthesis, glucose-1P => glycogen/starch (4) (complete 2/2)
M00855 Glycogen degradation, glycogen => glucose-6P (4) (complete 3/3)
M00549 Nucleotide sugar biosynthesis, glucose => UDP-glucose (3) (complete 3/3)
M00554 Nucleotide sugar biosynthesis, galactose => UDP-galactose (2) (complete 2/2)
2. Energy metabolism
Carbon fixation
M00579 Phosphate acetyltransferase-acetate kinase pathway, acetyl-CoA => acetate (3) (complete 2/2)
ATP synthesis
M00157 F-type ATPase, prokaryotes and chloroplasts (8) (complete 1/1)
M00159 V-type ATPase, prokaryotes (9) (complete 1/1)
3. Lipid metabolism
Fatty acid metabolism
M00082 Fatty acid biosynthesis, initiation (6) (complete 2/2)
M00083 Fatty acid biosynthesis, elongation (4) (complete 1/1)
4.Nucleotide metabolism
Purine metabolism
M00050 Guanine ribonucleotide biosynthesis, IMP => GDP,GTP (5) (complete 4/4)
Pyrimidine metabolism
M00051 Uridine monophosphate biosynthesis, glutamine (+ PRPP) => UMP (8) (complete 3/3)
M00052 Pyrimidine ribonucleotide biosynthesis, UMP => UDP/UTP,CDP/CTP (3) (complete 3/3)
M00053 Pyrimidine deoxyribonuleotide biosynthesis, CDP => dCTP (3) (complete 2/2)
M00938 Pyrimidine deoxyribonuleotide biosynthesis, UDP => dTTP (6) (complete 5/5)
5.Amino acid metabolism
Cysteine and methionine metabolism
M00021 Cysteine biosynthesis, serine => cysteine (2) (complete 2/2)
Lysine metabolism
M00526 Lysine biosynthesis, DAP dehydrogenase pathway, aspartate => lysine (6) (complete 6/6)
Arginine and proline metabolism
M00015 Proline biosynthesis, glutamate => proline (3) (complete 2/2)
Polyamine biosynthesis
M00134 Polyamine biosynthesis, arginine => ornithine => putrescine (2) (complete 2/2)
Aromatic amino acid metabolism
M00022 Shikimate pathway, phosphoenolpyruvate + erythrose-4P => chorismate (7) (complete 4/4)
6.Metabolism of cofactors and vitamins
Cofactor and vitamin metabolism
M00899 Thiamine salvage pathway, HMP/HET => TMP (3) (complete 2/2)
M00115 NAD biosynthesis, aspartate => quinolinate => NAD (5) (complete 5/5)
M00119 Pantothenate biosynthesis, valine/L-aspartate => pantothenate (5) (complete 5/5)
M00120 Coenzyme A biosynthesis, pantothenate => CoA (4) (complete 3/3)
M00924 Cobalamin biosynthesis, anaerobic, uroporphyrinogen III => sirohydrochlorin => cobyrinate a,c-diamide (13) (complete 11/11)
M00122 Cobalamin biosynthesis, cobyrinate a,c-diamide => cobalamin (7) (complete 7/7)
7.Biosynthesis of terpenoids and polyketides
Polyketide sugar unit biosynthesis
M00793 dTDP-L-rhamnose biosynthesis (4) (complete 3/

## Sheet: Table S5
Table S5: Predicted B-cell epitopes in CctA and in CstA by ABCpred server
Clostridium chauvoei CctA
No.	Rank	Sequence	Start position	Score
1	1	QIDTVSVSETMGYSIGGSLS	125	0.89
2	2	IVETPSEGVKTFTSSDTAYA	29	0.87
3	2	PDYRTLLMKDSVNSASWEVA	173	0.87
4	3	RNNRVKITKSIPTNQIDTVS	111	0.86
5	4	DQHNNQLTALVSTEGSFIPS	64	0.85
6	4	KAVQAQENTCIVETPSEGVK	19	0.85
7	4	KDSVNSASWEVAFNATKDGY	181	0.85
8	5	VIALTAPKGTEESTVKVEYN	246	0.84
9	6	NQLFMRYRLYNTGINNLTTD	211	0.81
10	7	TEWYGENNRNSRIDSSSESF	278	0.8
11	8	SWEVAFNATKDGYDRDSYHG	188	0.79
12	8	GKEGPKAGGGINGSYTAQRS	148	0.79
13	9	TEGSFIPSGLSRVGGYYQAD	76	0.78
14	9	ESTVKVEYNRFNDQYRLRWS	257	0.78
15	10	ADMYWPSKYYTTLTTYDRNN	94	0.77
16	10	KTFTSSDTAYADYNCFKTNL	38	0.77
17	11	FNDQYRLRWSGTEWYGENNR	267	0.75
Total				13.92
Clostridium septicum CstA
No.	Rank	Sequence	Start position	Score
1	1	STEGSFIPSGLTKVGGYYDA	81	0.89
2	1	KLDNSSETFVLDWENHTVEH	295	0.89
3	1	TVKYTRFSDEYKLNWSGTEW	267	0.89
4	2	GVNKFTYSDTAYADYNRFKT	42	0.88
5	3	AYADYNRFKTNLNVTFIEDS	52	0.86
6	3	GGSLSVEASKEGPKAGAELN	146	0.86
7	4	SQNKVKIARSIPTNQINTVS	117	0.85
8	5	KVGGYYDAQMYWPSVYRTIV	93	0.82
9	5	PKAGAELNGSYTAERSVTYD	158	0.82
10	6	GNQLFMRYRLYNKGIDNLTT	216	0.81
11	7	VVALKAPKGTKTSAITVKYT	252	0.8
12	7	NGSYTAERSVTYDQPDYRTL	165	0.8
13	7	YWPSVYRTIVESYDSQNKVK	103	0.8
14	8	GYDRDSYHGIYGNQLFMRYR	205	0.77
15	8	PTNQINTVSVSETMGYTIGG	128	0.77
16	9	TNRAEWQVVFNANKDGYDRD	190	0.76
17	9	DQPDYRTLLKSDSTNRAEWQ	177	0.76
18	10	YKLNWSGTEWYGTNNKLNKL	277	0.75
19	10	LGMSSPFTCKVVKAAENTCV	16	0.75
Total				15.53
